# Supplementary material for: Measurement and Correction of Microscopic Head Motion during Magnetic Resonance Imaging of the Brain
Source: PLOS journal article supplement (doi:10.1371/journal.pone.0048088), 2012-11-07
Supplement: S2 (10.1371/journal.pone.0048088.s002) [file journal.pone.0048088.s002]

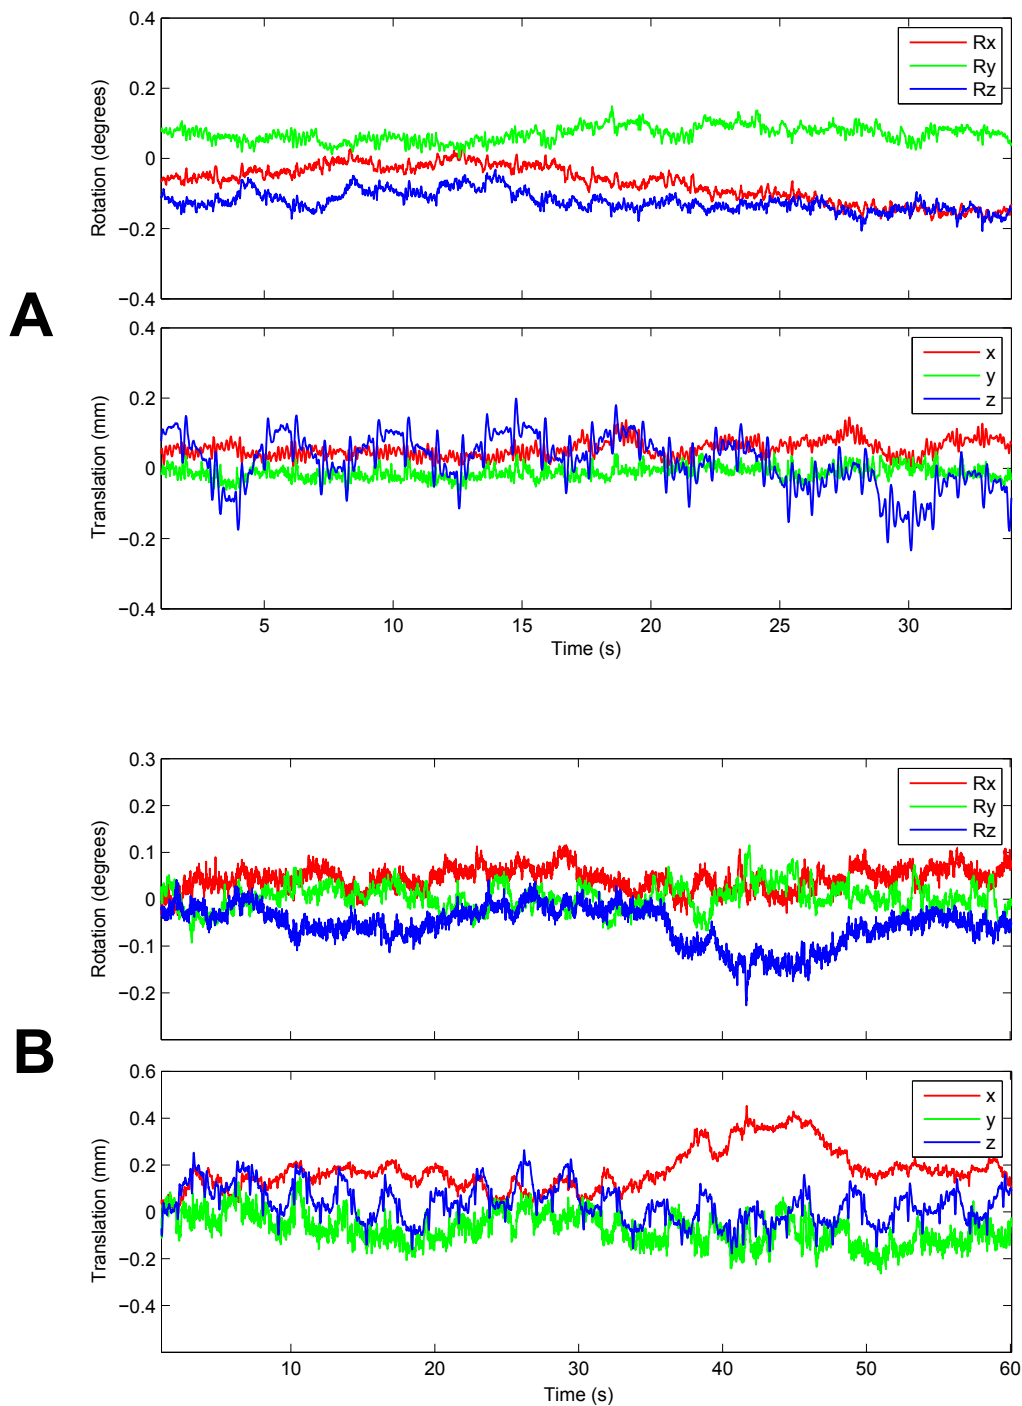

**Fig. S2.** Tracking data from (A) the 1.5 T and (B) the 3 T experiments. In these examples, the MPT marker was attached directly to the forehead of the subject; this differs from the results obtained at 7 T, and shown in Fig. 5, where a mouthpiece was used. With both marker attachment methods (and for all three scanners and subjects), the ballistocardiogram is visible in the z direction. In the examples shown here, respiratory motion is also clearly visible.
